# Supplementary material for: Downregulation of EB1 impedes Cx43 localization and cardiac conduction after hypothermic ischemia-reperfusion in rats
Source: PeerJ journal article supplement (doi:10.7717/peerj.19276), 2025-04-14
Supplement: DataS2.zip [file raw data-western blot-(CP IR group)membranal Cx43.xlsx]

## Sheet: Sheet1
	C1	C2	C3	I/R1	I/R2	I/R3
membranal Cx43	0.97815	0.992855	1.05069	0.448685	0.462351	0.527445
	1.24755	1.2233	1.16496	0.708977	0.679138	0.693613
	1.02827	0.75876	0.998235	0.734475	0.576963	0.757217
	1.00636	1.06199	1.06168	0.885396	0.887702	0.663839
	1.31424	1.17716	0.840457	0.806681	0.842762	0.752614
	0.69205	0.433246	0.970383	0.489659	0.317997	0.0788159
