# Supplementary material for: Downregulation of EB1 impedes Cx43 localization and cardiac conduction after hypothermic ischemia-reperfusion in rats
Source: PeerJ journal article supplement (doi:10.7717/peerj.19276), 2025-04-14
Supplement: DataS3.zip [file raw data- western blot-(CP IR group) EB1.xlsx]

## Sheet: Sheet1
EB1	C1	C2	C3	I/R1	I/R2	I/R3
	0.852407	0.81681	0.749092	0.302226	0.650019	0.505618
	0.993218	0.815015	0.865364	0.649027	0.569764	0.653259
	0.781986	1.196	1.10829	0.564444	0.938581	0.456276
	1.30071	0.987501	0.948251	0.814584	0.613656	0.603931
	0.966796	1.17018	0.912232	0.760937	0.789151	0.740172
	1.2589	1.03844	1.24733	0.839748	0.863369	0.776952
