# Supplementary material for: Downregulation of EB1 impedes Cx43 localization and cardiac conduction after hypothermic ischemia-reperfusion in rats
Source: PeerJ journal article supplement (doi:10.7717/peerj.19276), 2025-04-14
Supplement: DataS4.zip [file raw data-C I-R AAV9-CON AAV9-EB1 group western blot-membranal Cx43.xlsx]

## Sheet: Sheet1
C	I/R	AAV9-CON	AAV9-EB1
1.2544	0.785109	0.785936	1.01661
1.21314	0.369726	0.436207	0.722246
1.05673	0.202247	0.213158	0.808436
1.07258	0.437374	0.419368	0.685746
0.677269	0.325528	0.594854	0.927757
0.817226	0.654488	0.655379	0.93064
1.09744	0.514734	0.621809	0.813532
