# Supplementary material for: Downregulation of EB1 impedes Cx43 localization and cardiac conduction after hypothermic ischemia-reperfusion in rats
Source: PeerJ journal article supplement (doi:10.7717/peerj.19276), 2025-04-14
Supplement: DataS5.zip [file raw data-C I-R AAV9-CON AAV9-EB1 group western blot-free tubulin.xlsx]

## Sheet: Sheet1
C	I/R	AAV9-CON	AAV9-EB1
0.688603	1.24279	0.862197	0.352009
0.768062	1.39615	1.04486	0.459808
1.07903	1.69938	1.35328	0.6263
0.598151	1.14911	0.537894	0.439087
0.518831	1.23969	1.13615	0.794887
0.418453	0.876431	1.20529	0.734378
