# Supplementary material for: Downregulation of EB1 impedes Cx43 localization and cardiac conduction after hypothermic ischemia-reperfusion in rats
Source: PeerJ journal article supplement (doi:10.7717/peerj.19276), 2025-04-14
Supplement: DataS6.zip [file C I-R AAV9-CON AAV9-EB1 group western blot-Polymeric tubulin.xlsx]

## Sheet: Sheet1
C	I/R	AAV9-CON+I/R	AAV9-EB1+I/R
1.14702	1.0798	0.523297	0.816696
1.62243	0.601206	0.632813	0.911605
1.22974	0.569903	0.626272	0.982991
1.22974	0.569903	0.626272	0.982991
1.12672	0.782403	0.649282	1.04994
1.09003	0.456688	0.57766	1.08555
