# Supplementary material for: Downregulation of EB1 impedes Cx43 localization and cardiac conduction after hypothermic ischemia-reperfusion in rats
Source: PeerJ journal article supplement (doi:10.7717/peerj.19276), 2025-04-14
Supplement: DataS8.zip [file raw data-Total Cx43 EB1 N-cadherin.xlsx]

## Sheet: Sheet1
EB1						N-Ca
	0.679434	0.541287	0.388518	0.916694			1.00926	0.843479	0.792878	0.981664
	0.5934	0.228105	0.325319	1.07621			0.750206	0.887116	0.750096	0.606891
	0.899951	0.526338	0.508187	0.602751			0.460285	0.581225	0.489879	0.533361
	0.936739	0.452801	0.380037	0.807791			1.08192	1.66943	1.3467	1.44236
	0.804915	0.789081	0.443758	0.798582			0.514315	0.866073	0.827287	0.853877
	0.70156	0.509883	0.65848	0.825996			0.680816	0.496792	0.649523	0.82493
Total Cx43							0.866056	0.685456	0.746891	0.81931
	1.31369	0.696379	0.497717	1.3208
	1.12867	1.02306	0.499429	1.18323
	0.913338	0.665251	0.508029	1.0299
	0.969841	1.19879	0.766556	1.15756
	1.04105	0.521933	0.67626	0.817684
	1.06701	0.722077	0.69621	1.01407
	0.881809	0.961623	0.724695	1.10283
	0.971088	0.81242	0.807378	0.972376
