# Supplementary material for: Downregulation of EB1 impedes Cx43 localization and cardiac conduction after hypothermic ischemia-reperfusion in rats
Source: PeerJ journal article supplement (doi:10.7717/peerj.19276), 2025-04-14
Supplement: DataS13.zip [file C.xlsx]

## Sheet: Sheet1
Slice	Count	Total Area	Average Size	%Area	Mean	IntDen
Mask	301	1.008	0.003	1.381	255	0.854
	475	0.861	0.002	1.18	255	0.462
	451	0.955	0.002	1.309	255	0.54
	271	0.94	0.003	1.289	255	0.885
	340	0.51	0.002	0.699	255	0.451
	373	0.426	0.001	0.584	255	0.41
