# Supplementary material for: Downregulation of EB1 impedes Cx43 localization and cardiac conduction after hypothermic ischemia-reperfusion in rats
Source: PeerJ journal article supplement (doi:10.7717/peerj.19276), 2025-04-14
Supplement: DataS14.zip [file R.xlsx]

## Sheet: Sheet1
Slice	Count	Total Area	Average Size	%Area	Mean	IntDen
Mask	59	0.11	0.002	0.125	255	0.394
	59	0.2	0.002	0.13	255	0.409
	333	0.612	0.002	0.839	255	0.469
	325	0.506	0.002	0.693	255	0.397
	329	0.421	0.001	0.577	255	0.326
	283	0.362	0.001	0.496	255	0.326
