# Supplementary material for: Downregulation of EB1 impedes Cx43 localization and cardiac conduction after hypothermic ischemia-reperfusion in rats
Source: PeerJ journal article supplement (doi:10.7717/peerj.19276), 2025-04-14
Supplement: DataS15.zip [file AAV9-CON.xlsx]

## Sheet: Sheet1
Slice	Count	Total Area	Average Size	%Area	Mean	IntDen
Mask	245	0.315	0.001	0.431	255	0.327
	327	0.583	0.002	0.799	255	0.455
	187	0.197	0.001	0.27	255	0.269
	319	0.578	0.002	0.793	255	0.462
	311	0.327	0.001	0.448	255	0.268
	331	0.419	0.001	0.574	255	0.323
