# Supplementary material for: Downregulation of EB1 impedes Cx43 localization and cardiac conduction after hypothermic ischemia-reperfusion in rats
Source: PeerJ journal article supplement (doi:10.7717/peerj.19276), 2025-04-14
Supplement: DataS16.zip [file AAV9-EB1.xlsx]

## Sheet: Sheet1
Slice	Count	Total Area	Average Size	%Area	Mean	IntDen
Mask	376	1.252	0.003	1.717	255	0.849
	406	0.938	0.002	1.286	255	0.689
	292	0.533	0.002	0.731	255	0.465
	269	0.352	0.001	0.483	255	0.534
	475	1.188	0.003	1.628	255	0.638
	520	0.947	0.002	1.298	255	0.465
