# Supplementary material for: Downregulation of EB1 impedes Cx43 localization and cardiac conduction after hypothermic ischemia-reperfusion in rats
Source: PeerJ. 2025 Apr 14;13:e19276. doi: 10.7717/peerj.19276 (PMC12005192; doi:10.7717/peerj.19276)
Supplement: Supplemental Information 2 [file peerj-13-19276-s002.xls]

## Sheet: Sheet1
ITEM TO CHECK	IMPORTANCE	CHECKLIST
EXPERIMENTAL DESIGN
Definition of experimental and control groups	E	Line 126-127，Line 141-143
Number within each group	E	Line 127，Line 45
Assay carried out by core lab or investigator's lab?	D	N/A
Acknowledgement of authors' contributions	D	We have filled in the article submission
SAMPLE
Description	E
Volume/mass of sample processed	D	Line 209
Microdissection or macrodissection	E	N/A
Processing procedure	E
If frozen - how and how quickly?	E	N/A
If fixed - with what, how quickly?	E	N/A
Sample storage conditions and duration (especially for FFPE samples)	E	liquid nitrogen
NUCLEIC ACID EXTRACTION
Procedure and/or instrumentation	E
Name of kit and details of any modifications	E	Line 209
Source of additional reagents used	D	N/A
Details of DNase or RNAse treatment	E	RNA/DNA free water and materials
Contamination assessment (DNA or RNA)	E
Nucleic acid quantification	E	Line 211
Instrument and method	E	Line 210-211
Purity (A260/A280)	D	NANODROP ONEc (Thermo scientfic, America) and agarose gel electrophoresis (1%, 135V, 25min). Line 210-211
Yield	D	N/A
RNA integrity method/instrument	E	NANODROP ONEc (Thermo scientfic, America) and agarose gel electrophoresis (1%, 135V, 25min). Line 210-211
RIN/RQI or Cq of 3' and 5' transcripts	E	Line 217-219
Electrophoresis traces	D
Inhibition testing (Cq dilutions, spike or other)	E	N/A
REVERSE TRANSCRIPTION
Complete reaction conditions	E	Line 213
Amount of RNA and reaction volume	E	Line 213-214
Priming oligonucleotide (if using GSP) and concentration	E	N/A
Reverse transcriptase and concentration	E	First Strand cDNA Synthesis Kit (Yeasen, Shanghai, China). Line 214-215
Temperature and time	E	First Strand cDNA Synthesis Kit (Yeasen, Shanghai, China). Line 214-215
Manufacturer of reagents and catalogue numbers	D	First Strand cDNA Synthesis Kit (Yeasen, Shanghai, China). Line 214-215
Cqs with and without RT	D*
Storage conditions of cDNA	D	-20℃
qPCR TARGET INFORMATION
If multiplex, efficiency and LOD of each assay.	E	Biological Replicates: n=6.
Sequence accession number	E	N/A
Location of amplicon	D
Amplicon length	E	The length of the amplified product was 150bp
In silico specificity screen (BLAST, etc)	E	specificity screen through Primer-Blast
Pseudogenes, retropseudogenes or other homologs?	D
Sequence alignment	D
Secondary structure analysis of amplicon	D
Location of each primer by exon or intron (if applicable)	E	N/A
What splice variants are targeted?	E	N/A
qPCR OLIGONUCLEOTIDES
Primer sequences	E	Line 217-219
RTPrimerDB Identification Number	D	N/A
Probe sequences	D**	N/A
Location and identity of any modifications	E	N/A
Manufacturer of oligonucleotides	D	sangon biotech (Shanghai, China)
Purification method	D
qPCR PROTOCOL
Complete reaction conditions	E
Reaction volume and amount of cDNA/DNA	E	150ng(3ul), SYBR Green Master Mix kit (Yeasen, Shanghai, China) Line 217
Primer, (probe), Mg++ and dNTP concentrations	E	SYBR Green Master Mix kit (Yeasen, Shanghai, China)（Primer 0.2 μM） Line 215
Polymerase identity and concentration	E	SYBR Green Master Mix kit (Yeasen, Shanghai, China) Kit Instructions（1x） Line 215
Buffer/kit identity and manufacturer	E	Line 215
Exact chemical constitution of the buffer	D
Additives (SYBR Green I, DMSO, etc.)	E	SYBR Green Master Mix kit (Yeasen, Shanghai, China) Line 215
Manufacturer of plates/tubes and catalog number	D	0.2ml PCR 8-strip tubes: NEST 403002; 1.5ml DNase/RNase free tubes: labselect MCT-OO1-150
Complete thermocycling parameters	E	Line 220
Reaction setup (manual/robotic)	D	Line 219-220
Manufacturer of qPCR instrument	E	Line 216
qPCR VALIDATION
Evidence of optimisation (from gradients)	D
Specificity (gel, sequence, melt, or digest)	E	Single effective melt peak
For SYBR Green I, Cq of the NTC	E	Cq of the NTC: none
Standard curves with slope and y-intercept	E	N/A
PCR efficiency calculated from slope	E	N/A
Confidence interval for PCR efficiency or standard error	D
r2 of standard curve	E	N/A
Linear dynamic range	E	N/A
Cq variation at lower limit	E	reference genes:12-20; target gene:14-30
Confidence intervals throughout range	D
Evidence for limit of detection	E	N/A
If multiplex, efficiency and LOD of each assay.	E	N/A
DATA ANALYSIS
qPCR analysis program (source, version)	E	CFX96 Real-Time PCR system (Bio-Rad, USA). Line 216
Cq method determination	E
Outlier identification and disposition	E	Identified outliers in cq values with differences exceeding 0.5 and excluded them
Results of NTCs	E	Cq of the NTC: none
Justification of number and choice of reference genes	E	Line 218-219
Description of normalisation method	E	2-ΔΔCt. Line 221
Number and concordance of biological replicates	D
Number and stage (RT or qPCR) of technical replicates	E	N/A
Repeatability (intra-assay variation)	E	repeated three times
Reproducibility (inter-assay variation, %CV)	D
Power analysis	D
Statistical methods for result significance	E	Line 248-253
Software (source, version)	E	CFX96 Real-Time PCR system (Bio-Rad, USA). Line 216
Cq or raw data submission using RDML	D
Table 1. MIQE checklist for authors, reviewers and editors. All essential information (E) must be submitted with the manuscript. Desirable
information (D) should be submitted if available. If using primers obtained from RTPrimerDB, information on qPCR target, oligonucleotides,
protocols and validation is available from that source.
*: Assessing the absence of DNA using a no RT assay is essential when first extracting RNA. Once the sample has been validated as
RDNA-free, inclusion of a no-RT control is desirable, but no longer essential.
**: Disclosure of the probe sequence is highly desirable and strongly encouraged. However, since not all commercial pre-designed assay
vendors provide this information, it cannot be an essential requirement. Use of such assays is advised against.
