# Supplementary material for: Downregulation of EB1 impedes Cx43 localization and cardiac conduction after hypothermic ischemia-reperfusion in rats
Source: PeerJ. 2025 Apr 14;13:e19276. doi: 10.7717/peerj.19276 (PMC12005192; doi:10.7717/peerj.19276)
Supplement: Supplemental Information 19 [file peerj-13-19276-s019.xlsx]

## Sheet: Sheet1
Target gene (Mapre1)Cq value					Reference gene (Actin) Cq value				Internal reference Cq average		∆Cq value = target gene Cq value - mean of reference gene			Control group ∆Cq value average	∆∆Cq value = target gene ∆Cq value - mean ∆Cq value of the control group				Relative expression level = 2 - ∆∆Cq value
											1	2	3		1	2	3		1	2	3
C1	19.7566	19.715	20.5534		C1	17.4118	17.6561	17.8287	17.8848		1.87181	1.83019	2.66859	2.32703	-0.455224	-0.496847	0.341551		2.45522	2.49685	1.65845	C1
C2	20.0242	19.6344	20.9325		C2	18.1963	18.5694	17.8569			2.13945	1.74958	3.0477		-0.187588	-0.577453	0.720671		2.18759	2.57745	1.27933	C2
C3	19.4842	20.634	21.1721		C3	17.9329	17.8421	17.6687			1.59946	2.74925	3.28728		-0.727571	0.422216	0.960245		2.72757	1.57778	1.03975	C3
I/R1	19.4146	19.6566	20.8396		I/R1	16.4218	16.3865	17.6536	17.0359		2.37866	2.62065	3.80365		0.0516267	0.293619	1.47662		1.94837	1.70638	0.523383	I/R1
I/R2	19.9181	19.7408	21.159		I/R2	17.0061	16.2137	17.7401			2.88222	2.70487	4.12308		0.555183	0.377839	1.79604		1.44482	1.62216	0.203957	I/R2
I/R3	19.4677	19.9565	21.4935		I/R3	16.4825	17.7036	17.7153			2.43176	2.92053	4.45758		0.104728	0.593499	2.13054		1.89527	1.4065	-0.130543	I/R3
AAV9-CON 1	19.8129	19.6531	21.2424		AAV9-CON 1	16.8688	16.5749	17.6361	17.0249		2.78806	2.62826	4.21756		0.461024	0.301224	1.89052		1.53898	1.69878	0.109479	AAV9-CON 1
AAV9-CON 2	19.6064	19.3859	21.0055		AAV9-CON 2	17.0789	16.5844	17.4172			2.58158	2.36101	3.98069		0.254547	0.0339721	1.65365		1.74545	1.96603	0.346347	AAV9-CON 2
AAV9-CON 3	20.0067	21.5247	21.184		AAV9-CON 3	16.9942	16.4568	17.6125			2.98189	4.49987	4.15913		0.654855	2.17284	1.83209		1.34515	-0.172836	0.167908	AAV9-CON 3
AAV9-EB1 1	20.6251	20.3276	20.0472		AAV9-EB1 1	19.0717	18.9115	16.9127	18.393		2.23204	1.93454	1.65421		-0.0949916	-0.392498	-0.672824		2.09499	2.3925	2.67282	AAV9-EB1 1
AAV9-EB1 2	20.0453	20.2448	20.0132		AAV9-EB1 2	19.627	19.1269	16.7941			1.65227	1.85178	1.62023		-0.674768	-0.475258	-0.706809		2.67477	2.47526	2.70681	AAV9-EB1 2
AAV9-EB1 3	20.4268	20.2253	20.1113		AAV9-EB1 3	19.0866	19.2969	16.7098			2.03381	1.8323	1.71827		-0.293225	-0.494737	-0.608761		2.29323	2.49474	2.60876	AAV9-EB1 3
																			C	I/R	AAV9-CON	AAV9-EB1
																			2.45522	1.94837	1.53898	2.09499
																			2.18759	1.44482	1.74545	2.67477
																			2.72757	1.89527	1.34515	2.29323
																			2.49685	1.70638	1.69878	2.3925
																			2.57745	1.62216	1.96603	2.47526
																			1.57778	1.4065	-0.172836	2.49474
																			1.65845	0.523383	0.109479	2.67282
																			1.27933	0.203957	0.346347	2.70681
																			1.03975	-0.130543	0.167908	2.60876
