# Supplementary material for: Downregulation of EB1 impedes Cx43 localization and cardiac conduction after hypothermic ischemia-reperfusion in rats
Source: PeerJ. 2025 Apr 14;13:e19276. doi: 10.7717/peerj.19276 (PMC12005192; doi:10.7717/peerj.19276)
Supplement: Supplemental Information 20 [file peerj-13-19276-s020.xlsx]

## Sheet: Sheet1
			Conduction velocity(mm/ms)					Absolite inhomogeneity(ms)					Inhomogeneity index						Heart rate beats/min									Total arrhythmia time during reperfusion（s）							Types of reperfusion arrhythmia(case)							Incidence of reperfusion arrhythmia（%）
		I/R	AAV9-CON	AAV9-EB1			I/R	AAV9-CON	AAV9-EB1			I/R	AAV9-CON	AAV9-EB1
		2.08	4.169	4.3461			0.528	0.41	0.706			1.81	1.81	2.017			I/R	302	273	245	267	273	288	255	302			I/R	AAV9-CON	AAV9-EB1						AVB	PVB	VT	VF			I/R	AAV9-CON	AAV9-EB1
		4.1612	2.24	2.289			0.525	1.144	0.525			3	2.15	1.85			AAV9-CON	214	237	204	263	293	261	271	263			59	0	9					I/R	1	3	1	1			75	87.5	12.5
		1.983	2.392	3.6			0.706	0.724	0.705			2.017	1.993	2.195			AAV9-EB1	268	276	283	267	243	250	251	263			0	43	0					AAV9-CON	1	3	2	0
T0		2.509	2.504	2.241			1.927	0.534	0.385			2.75	2.175	1.375														63	67	0					AAV9-EB1	0	1	0	0
		2.182	1.8767	2.133			1.004	1.728	0.423			1.564	2.933	2.263														11	0	0
		2.784	3.445	2.109			0.476	0.775	0.43			1.63	2.72	2.3														74	48	0
		2.783	2.788	2.153			0.516	0.533	0.43			2.763	2.22	2.5														32	22	0
		3.422	2.822	3.541			1.033	0.884	0.534			2.773	2.993	1.83														86	71	0
																												0	16	0
		I/R	AAV9-CON	AAV9-EB1			I/R	AAV9-CON	AAV9-EB1			I/R	AAV9-CON	AAV9-EB1
		2.407	1.389	3.402			1.846	0.971	0.823			2.169	2.233	2.35			I/R	296	253	254	240	247	236		221
		2.761	1.922	3.174			1.49	1.892	0.798			3.35	2.887	2.05			AAV9-CON	239	301	217	224	253	275	269	252
		1.473	1.682	2.259			0.948	2.807	0.877			2.775	3.005	2.805			AAV9-EB1	273	264	297	254	267	261	237	279
T1		1.063	2.236	2.157			2.335	0.927	0.423			4.01	2.533	1.508
		1.951	2.5052	2.541			1.467	2.867	0.661			2.883	3.222	1.769
		1.357	2.872	2.879			0.989	0.832	0.705			2.205	4.891	2.587
		2.014	1.433	2.761			1.213	0.833	0.329			3.011	4	2.763
		2.223	1.982	2.422			2.12	1.501	0.469			4.004	3.228	2.01
		I/R	AAV9-CON	AAV9-EB1			I/R	AAV9-CON	AAV9-EB1			I/R	AAV9-CON	AAV9-EB1
		2.0177	2.581	3.5885			0.825	1.198	0.723			2.001	2.131	2.03			I/R	300	295	258	253	259	292		247
		2.95	1.873	3.604			1.642	1.789	0.836			3.667	2.566	1.983			AAV9-CON	210	198	225	240	265	231	271	240
		1.58	1.709	2.364			0.914	2.239	0.823			2.63	2.846	2.014			AAV9-EB1	279	283	279	278	256	268	255	281
T2		1.1862	2.2256	2.031			2.156	0.905	0.71			4.075	2.465	1.689
		1.605	2.1496	3.065			1.398	2.471	0.651			2.555	2.017	1.593
		1.488	2.533	2.11			0.953	0.813	0.703			2.017	4.012	2.45
		2.202	1.822	2.719			1.245	0.922	0.42			2.898	3.254	2.1
		2.321	2.032	2.221			1.003	0.991	0.518			3.822	3.007	2.22
